# Supplementary material for: Co-expression network of neural-differentiation genes shows specific pattern in schizophrenia
Source: PubMed Central journal article supplement (PMC4493810; doi:10.1186/s12920-015-0098-9), 2015-05-16
Supplement: 12920_2015_98_MOESM1_ESM.pdf [file 12920_2015_98_MOESM1_ESM.pdf]

**Supplemental Figure 1** – Gain of 1.2 MB at 20q11.21 acquired 1by hiPSC and maintained in the NPC. The region contains 32 genes.

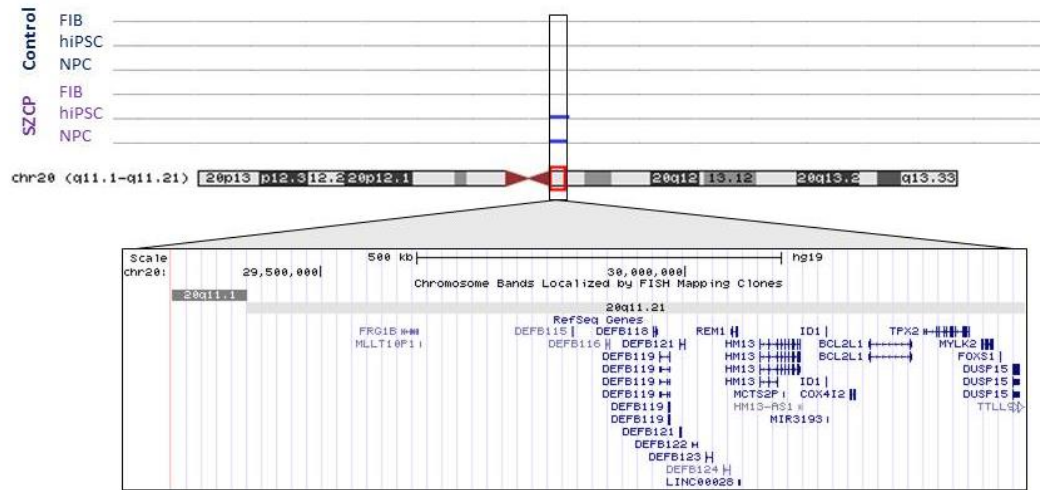

**Supplemental Figure 2** –Venn-diagrams constructed to select CpGs associated with neural-differentiation in a SCZP. Selected CpGs are highlighted in red. Selection of **(A)** hypo- and **(B)** hyper-methylated CpGs in control; **(C)** hypo- and **(D)** hyper-methylated CpGs in SCZP. CpGs that were exclusively **(E)** hypo-methylated or **(F)** hyper-methylated in SCZP.

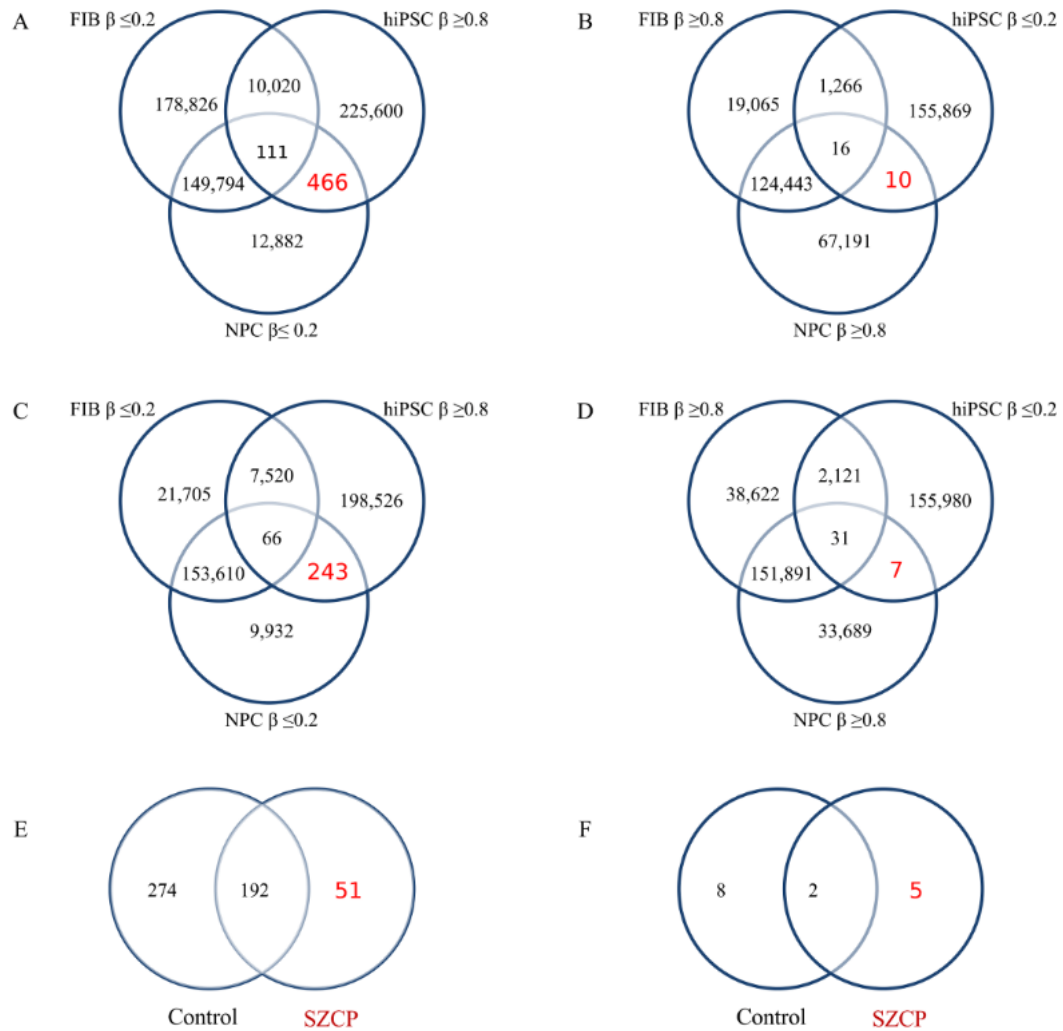

**Supplemental Figure 3** – Diagram containing the different analysis steps with gene expression data.

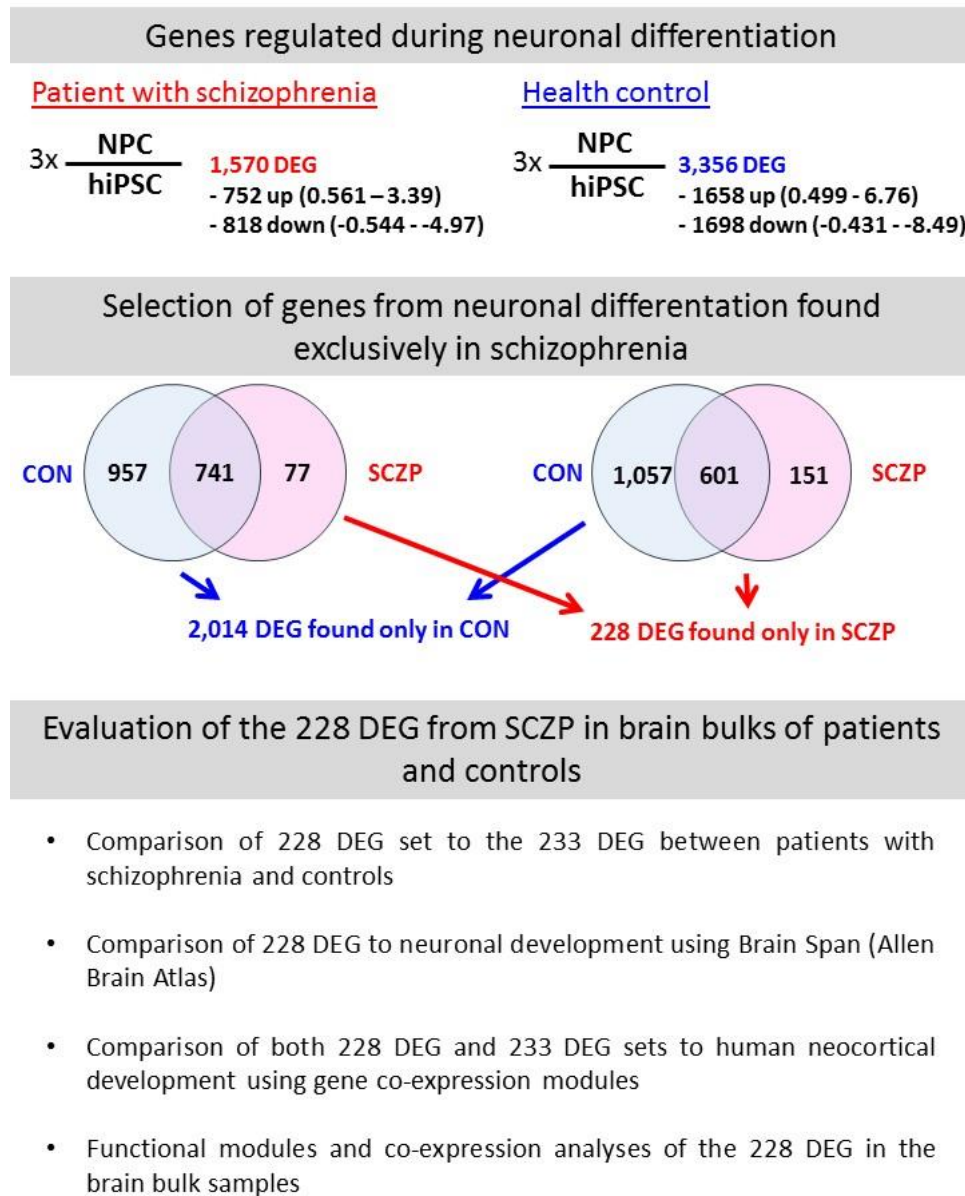

**Supplemental Figure 4** - Scatter smooth of module eigengene values identified by Parikshak et al (2013) at different stages of neocortical development. The module eigengene values are defined as the first principal component (PC) of the expression matrix. Modules eigengene values are represented in y-axis and age are provided in days. Different periods of lifetime are scaled from light to dark blue colors: early foetal, early-mid foetal, late mid-foetal, late foetal, neonatal/early infancy and late infancy. The red line indicates the birth. Graphs show the distribution of the 228 DEG (in M8) and 233 DEG (in M1, M5 and M15) only in the modules that were statistically significant enriched to one of our datasets. M8 comprises genes preferentially expressed in early foetal period; M1, M5 and M15 comprise genes preferentially expressed in mid-foetal or late foetal and infancy periods.

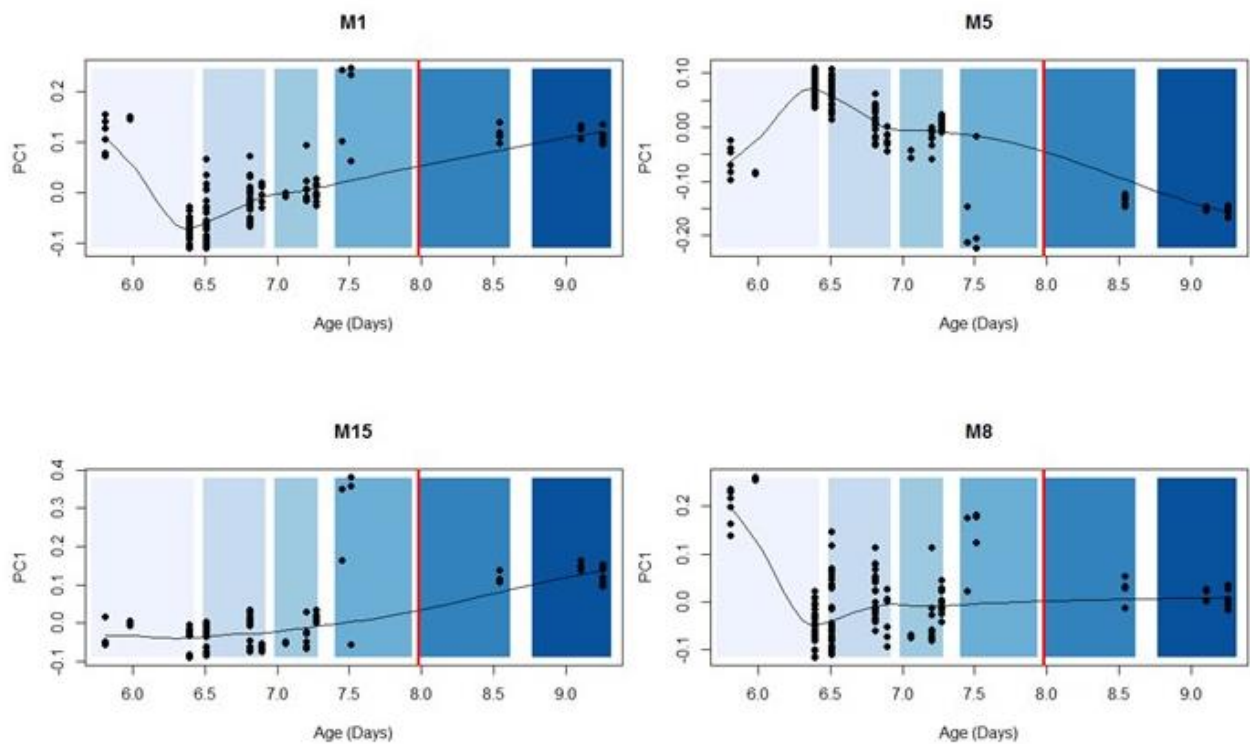

**Supplemental Table 1** – Genes found hypo- and hyper-methylated in SCZP.

| Hypo-methylated genes |     |           |                             | Hyper-methylated genes |     |          |                             |
|-----------------------|-----|-----------|-----------------------------|------------------------|-----|----------|-----------------------------|
| Gene                  | Chr | Mapinfo   | Relation to UCSC CpG island | Gene                   | Chr | Mapinfo  | Relation to UCSC CpG island |
| <i>ERRFI1</i>         | 1   | 8086959   | S_Shore                     | <i>HK1</i>             | 10  | 71149910 |                             |
| <i>RERE</i>           | 1   | 8509372   |                             | <i>LOC145845</i>       | 15  | 37170816 | N_Shore                     |
| <i>ZBTB40</i>         | 1   | 22782452  | S_Shelf                     | <i>CYP2F1</i>          | 19  | 41632920 | N_Shore                     |
| <i>GULP1</i>          | 2   | 189382445 |                             |                        |     |          |                             |
| <i>OBSL1</i>          | 2   | 220436936 | S_Shore                     |                        |     |          |                             |
| <i>SH3BP4</i>         | 2   | 235907796 |                             |                        |     |          |                             |
| <i>VGLL4</i>          | 3   | 11651881  |                             |                        |     |          |                             |
| <i>PLSCR5</i>         | 3   | 146323078 |                             |                        |     |          |                             |
| <i>PLCH1</i>          | 3   | 155394303 |                             |                        |     |          |                             |
| <i>SORBS2</i>         | 4   | 186732926 |                             |                        |     |          |                             |
| <i>SEPT8</i>          | 5   | 132111426 | N_Shore                     |                        |     |          |                             |
| <i>SLC25A13</i>       | 7   | 95811907  |                             |                        |     |          |                             |
| <i>SRPK2</i>          | 7   | 104945248 | S_Shelf                     |                        |     |          |                             |
| <i>PRRT4</i>          | 7   | 127997529 | N_Shelf                     |                        |     |          |                             |
| <i>SMARCA2</i>        | 9   | 2044055   | N_Shelf                     |                        |     |          |                             |
| <i>PALM2</i>          | 9   | 112593847 |                             |                        |     |          |                             |
| <i>MPP7</i>           | 10  | 28436499  |                             |                        |     |          |                             |
| <i>FUT11</i>          | 10  | 75533431  | S_Shore                     |                        |     |          |                             |
| <i>NAV2</i>           | 11  | 19546133  |                             |                        |     |          |                             |
| <i>C11orf9</i>        | 11  | 61541027  | N_Shelf                     |                        |     |          |                             |
| <i>EXPH5</i>          | 11  | 108409825 |                             |                        |     |          |                             |
| <i>BACE1</i>          | 11  | 117171073 |                             |                        |     |          |                             |
| <i>UBASH3B</i>        | 11  | 122655638 |                             |                        |     |          |                             |
| <i>TMCC3</i>          | 12  | 95010113  |                             |                        |     |          |                             |
| <i>FGD6</i>           | 12  | 95477853  |                             |                        |     |          |                             |
| <i>FREM2</i>          | 13  | 39358795  |                             |                        |     |          |                             |
| <i>FARP1</i>          | 13  | 98919378  |                             |                        |     |          |                             |
| <i>DPF3</i>           | 14  | 73209128  |                             |                        |     |          |                             |
| <i>TTLL5</i>          | 14  | 76309157  |                             |                        |     |          |                             |
| <i>ATG2B</i>          | 14  | 96752011  |                             |                        |     |          |                             |
| <i>MEOX1</i>          | 17  | 41739246  |                             |                        |     |          |                             |
| <i>LRRN4</i>          | 20  | 6035902   | S_Shelf                     |                        |     |          |                             |
| <i>ARSF</i>           | X   | 2984985   |                             |                        |     |          |                             |

**Supplemental Table 2** – Set of 228 genes found altered during neural-differentiation of the SCZP cells.

| <i>up-regulated genes</i> |            |                  |               |                  |               |                 |          |
|---------------------------|------------|------------------|---------------|------------------|---------------|-----------------|----------|
| <b>ACTA1</b>              | 1q42.13    | <i>FH</i>        | 1q42.1        | <i>NRL</i>       | 14q11.1-q11.2 | <i>WASF3</i>    | 13q12    |
| <b>ADRA2A</b>             | 10q25.2    | <i>FLT1</i>      | 13q12         | <i>NUP107</i>    | 12q15         | <i>WASL</i>     | 7q31.3   |
| <b>ADRBK2</b>             | 22q12.1    | <i>FOXP1</i>     | 14q13         | <i>ORMDL1</i>    | 2q32          | <i>WDR44</i>    | Xq24     |
| <b>AGL</b>                | 1p21       | <i>FOXP2</i>     | 2p22-p16      | <i>PC</i>        | 11q13.4-q13.5 | <i>WIF1</i>     | 12q14.3  |
| <b>ANAPC4</b>             | 4p15.2     | <i>FZD5</i>      | 2q33.3        | <i>PDE4B</i>     | 1p31          | <i>XIST</i>     | Xq13.2   |
| <b>ARMC8</b>              | 3q22.3     | <i>GAL3ST1</i>   | 22q12.2       | <i>PIK3C2A</i>   | 11p15.5-p14   | <i>XK</i>       | Xp21.1   |
| <b>ASNS</b>               | 7q21.3     | <i>GFOD1</i>     | 6pter-p22.1   | <i>PMAIP1</i>    | 18q21.32      | <i>YWHAG</i>    | 7q11.23  |
| <b>ASPM</b>               | 1q31       | <i>GIGYF2</i>    | 2q37.1        | <i>PNMA1</i>     | 14q24.3       | <i>ZGLP1</i>    | 19p13.2  |
| <b>ATF4</b>               | 22q13.1    | <i>GJC1</i>      | 17q21.31      | <i>PNMT</i>      | 17q           | <i>ZMPSTE24</i> | 1p34     |
| <b>ATP6V1C1</b>           | 8q22.3     | <i>GMBB</i>      | 14q22.2       | <i>PNPT1</i>     | 2p15          | <i>ZNF273</i>   | 7q11.21  |
| <b>BCLAF1</b>             | 6q22-q23   | <i>GRB10</i>     | 7p12.2        | <i>PPM1B</i>     | 2p21          | <i>ZNF426</i>   | 19p13.2  |
| <b>BID</b>                | 22q11.1    | <i>GTF2H1</i>    | 11p15.1-p14   | <i>PRDX4</i>     | Xp22.11       | <i>ZNF614</i>   | 19q13.41 |
| <b>FAM204A</b>            | 10q26.11   | <i>HDAC2</i>     | 6q21          | <i>PSMB10</i>    | 16q22.1       | <i>ZNF99</i>    | 19p12    |
| <b>CACNA1E</b>            | 1q25-q31   | <i>HEY2</i>      | 6q21          | <i>PSMD7</i>     | 16q22.3       |                 |          |
| <b>CACNA1H</b>            | 16p13.3    | <i>HISPPD1</i>   | 5q21.1        | <i>PSTK</i>      | 10q26.13      |                 |          |
| <b>CADM3</b>              | 1q21.2-q22 | <i>HLA-DOA</i>   | 6p21.3        | <i>PTPN12</i>    | 7q11.23       |                 |          |
| <b>CAPRIN1</b>            | 11p13      | <i>HNRNPH1</i>   | 5q35.3        | <i>PYGL</i>      | 14q21-q22     |                 |          |
| <b>CASC5</b>              | 15q14      | <i>HOXB9</i>     | 17q21.3       | <i>RAD54B</i>    | 8q22.1        |                 |          |
| <b>CCAR1</b>              | 10q21.3    | <i>HRK</i>       | 12q24.22      | <i>RANBP2</i>    | 2q12.3        |                 |          |
| <b>CD24</b>               | 6q21       | <i>HUWE1</i>     | Xp11.22       | <i>RANGRF</i>    | 17p13.1       |                 |          |
| <b>CDK5R1</b>             | 17q11.2    | <i>IMPA1</i>     | 8q21.13-q21.3 | <i>RARS</i>      | 5q35.1        |                 |          |
| <b>CDO1</b>               | 5q23.2     | <i>ING3</i>      | 7q31          | <i>RB1CC1</i>    | 8q11          |                 |          |
| <b>CENPJ</b>              | 13q12.12   | <i>ING5</i>      | 2q37.3        | <i>RBM16</i>     | 6q25.1-q25.3  |                 |          |
| <b>CHUK</b>               | 10q24-q25  | <i>JAZF1</i>     | 7p15.2-p15.1  | <i>RCBTB1</i>    | 13q14         |                 |          |
| <b>CIT</b>                | 12q24      | <i>KHDRBS1</i>   | 1p32          | <i>RINT1</i>     | 7q22.3        |                 |          |
| <b>COL9A3</b>             | 20q13.3    | <i>KPNA4</i>     | 3q25.33       | <i>SARNP</i>     | 12q13.2       |                 |          |
| <b>CPOX</b>               | 3q12       | <i>LIN7A</i>     | 12q21         | <i>SFRS1</i>     | 17q22         |                 |          |
| <b>CTSF</b>               | 11q13      | <i>LIPA</i>      | 10q23.2-q23.3 | <i>SGK1</i>      | 6q23          |                 |          |
| <b>CXCL5</b>              | 4q13.3     | <i>LOC389634</i> | 12p13.31      | <i>SLC38A4</i>   | 12q13         |                 |          |
| <b>DCLRE1A</b>            | 10q25.1    | <i>LOC645937</i> | 9q22.1        | <i>SMG5</i>      | 1q21.2        |                 |          |
| <b>DDX6</b>               | 11q23.3    | <i>LRRRC49</i>   | 15q23         | <i>SMO</i>       | 7q32.3        |                 |          |
| <b>DHX36</b>              | 3p13-q23   | <i>METAP2</i>    | 12q22         | <i>SNORD3B-1</i> | 17p11.2       |                 |          |
| <b>DOK1</b>               | 2p13       | <i>METT10D</i>   | 17p13.3       | <i>SNTB1</i>     | 8q23-q24      |                 |          |
| <b>DPM1</b>               | 20q13.13   | <i>MICB</i>      | 6p21.3        | <i>SOX3</i>      | Xq27.1        |                 |          |

|                             |               |                 |               |                |             |
|-----------------------------|---------------|-----------------|---------------|----------------|-------------|
| <b>DUSP6</b>                | 12q22-q23     | <b>MIF</b>      | 22q11.23      | <b>SPRY4</b>   | 5q31.3      |
| <b>DYNC2H1</b>              | 11q21-q22.1   | <b>MRPL19</b>   | 2p11.1-q11.2  | <b>SSTR1</b>   | 14q13       |
| <b>E2F3</b>                 | 6p22          | <b>MTF1</b>     | 1p33          | <b>STX4</b>    | 16p11.2     |
| <b>EED</b>                  | 11q14.2-q22.3 | <b>MTHFS</b>    | 15q25.1       | <b>SYPL2</b>   | 1p13.3      |
| <b>EIF3A</b>                | 10q26         | <b>MYB</b>      | 6q22-q23      | <b>SYT14</b>   | 1q32.2      |
| <b>EIF3B</b>                | 7p22.3        | <b>MYBL1</b>    | 8q22          | <b>TBK1</b>    | 12q14.1     |
| <b>EIF5</b>                 | 14q32.32      | <b>NEFH</b>     | 22q12.2       | <b>TEK</b>     | 9p21        |
| <b>EPC1</b>                 | 10p11         | <b>NKRF</b>     | Xq24          | <b>TMEM208</b> | 16q22.1     |
| <b>ETV1</b>                 | 7p21.3        | <b>NLGN1</b>    | 3q26.31       | <b>TOP3A</b>   | 17p12-p11.2 |
| <b>FAM133B</b>              | 7q21.2        | <b>NLK</b>      | 17q11.2       | <b>TRDMT1</b>  | 10p15.1     |
| <b>FEZ1</b>                 | 11q24.2       | <b>NOC3L</b>    | 10q23.33      | <b>TRIM24</b>  | 7q32-q34    |
| <b>FGD4</b>                 | 12p11.21      | <b>NPR1</b>     | 1q21-q22      | <b>USP1</b>    | 1p31.3      |
| <b>down-regulated genes</b> |               |                 |               |                |             |
| <b>ACCN1</b>                | 17q11.2-q12   | <b>MAP3K5</b>   | 6q22.33       |                |             |
| <b>ADARB1</b>               | 21q22.3       | <b>MDGA1</b>    | 6p21          |                |             |
| <b>ADIPOR2</b>              | 12p13.31      | <b>MGAT4B</b>   | 5q35          |                |             |
| <b>AKT1</b>                 | 14q32.32      | <b>MOCS3</b>    | 20q13.13      |                |             |
| <b>ALDH1A1</b>              | 9q21.13       | <b>NDEL1</b>    | 17p13.1       |                |             |
| <b>APOA1</b>                | 11q23-q24     | <b>NEK6</b>     | 9q33.3-q34.11 |                |             |
| <b>APOA2</b>                | 1q21-q23      | <b>NTF3</b>     | 12p13         |                |             |
| <b>AQP1</b>                 | 7p14          | <b>PACS1</b>    | 11q13.1-q13.2 |                |             |
| <b>ARMCX6</b>               | Xq21.33-q22.3 | <b>PDGFA</b>    | 7p22          |                |             |
| <b>ATXN7</b>                | 3p21.1-p12    | <b>PDK2</b>     | 17q21.33      |                |             |
| <b>BACE1</b>                | 11q23.2-q23.3 | <b>PEX6</b>     | 6p21.1        |                |             |
| <b>BCL11A</b>               | 2p16.1        | <b>PFN2</b>     | 3q25.1        |                |             |
| <b>CACNA1C</b>              | 12p13.3       | <b>PLOD2</b>    | 3q24          |                |             |
| <b>CCDC149</b>              | 4p15.2        | <b>PNOC</b>     | 8p21          |                |             |
| <b>CEACAM1</b>              | 19q13.2       | <b>PPAP2B</b>   | 1p32.2        |                |             |
| <b>CEBPB</b>                | 20q13.1       | <b>PPIB</b>     | 15q21-q22     |                |             |
| <b>CLDN11</b>               | 3q26.2-q26.3  | <b>PPP1R13B</b> | 14q32.33      |                |             |
| <b>CLIP4</b>                | 2p23.2        | <b>PRDM16</b>   | 1p36.23-p33   |                |             |
| <b>COL16A1</b>              | 1p35-p34      | <b>RABEP2</b>   | 16p11.2       |                |             |
| <b>CPE</b>                  | 4q32.3        | <b>RARA</b>     | 17q21         |                |             |
| <b>CST3</b>                 | 20p11.21      | <b>RBM20</b>    | 10q25.2       |                |             |
| <b>CTDSP1</b>               | 2q35          | <b>RHOBTB2</b>  | 8p21.3        |                |             |

|                |          |               |            |
|----------------|----------|---------------|------------|
| <b>CTNND1</b>  | 11q11    | <i>RIPK4</i>  | 21q22.3    |
| <b>CUX1</b>    | 7q22.1   | <i>RPL11</i>  | 1p36.1-p35 |
| <b>DCT</b>     | 13q32    | <i>RPLP2</i>  | 11p15.5    |
| <b>DUX4</b>    | 10q26.3  | <i>S100A7</i> | 1q21       |
| <b>EDNRA</b>   | 4q31.22  | <i>SPHK1</i>  | 17q25.2    |
| <b>EPHA2</b>   | 1p36     | <i>SPI1</i>   | 11p11.2    |
| <b>FBRS</b>    | 16p11.2  | <i>SSC5D</i>  | 19q13.42   |
| <b>FOS</b>     | 14q24.3  | <i>TICAM1</i> | 19p13.3    |
| <b>FURIN</b>   | 15q26.1  | <i>USH1G</i>  | 17q25.1    |
| <b>FXD3</b>    | 19q13.12 | <i>ZMIZ1</i>  | 10q22.3    |
| <b>GPR155</b>  | 2q31.1   |               |            |
| <b>HAAO</b>    | 2p21     |               |            |
| <b>HS6ST2</b>  | Xq26.2   |               |            |
| <b>HSD17B8</b> | 6p21.3   |               |            |
| <b>HTRA1</b>   | 10q26.3  |               |            |
| <b>IL13RA1</b> | Xq24     |               |            |
| <b>ITGA2</b>   | 5q11.2   |               |            |
| <b>KCNK15</b>  | 20q13.12 |               |            |
| <b>KDELC2</b>  | 11q22.3  |               |            |
| <b>LGALS3</b>  | 14q22.3  |               |            |
| <b>LOXL1</b>   | 15q22    |               |            |
| <b>LYPD6</b>   | 2q23.2   |               |            |
| <b>MANEA</b>   | 6q16.1   |               |            |



**Supplemental Table 3** – Genes from the 228 gene set that have been described in schizophrenia studies

| <b>Gene</b>    | <b>Information retrieved from Gene/NCBI (Summary)</b>                                                                                                                                                                                                                                                                                                                                                                                                                                                                                                                                                                                                                                                                                                                                                                                                                                                                            |
|----------------|----------------------------------------------------------------------------------------------------------------------------------------------------------------------------------------------------------------------------------------------------------------------------------------------------------------------------------------------------------------------------------------------------------------------------------------------------------------------------------------------------------------------------------------------------------------------------------------------------------------------------------------------------------------------------------------------------------------------------------------------------------------------------------------------------------------------------------------------------------------------------------------------------------------------------------|
| <i>NDEL1</i>   | This gene encodes a coiled-coil protein that plays a role in multiple processes including cytoskeletal organization, cell signaling and neuron migration, outgrowth and maintenance.                                                                                                                                                                                                                                                                                                                                                                                                                                                                                                                                                                                                                                                                                                                                             |
| <i>ATF4</i>    | This gene encodes a transcription factor that was originally identified as a widely expressed mammalian DNA binding protein that could bind a tax-responsive enhancer element in the LTR of HTLV-1. The encoded protein was also isolated and characterized as the cAMP-response element binding protein 2 (CREB-2). The protein encoded by this gene belongs to a family of DNA-binding proteins that includes the AP-1 family of transcription factors, cAMP-response element binding proteins (CREBs) and CREB-like proteins. These transcription factors share a leucine zipper region that is involved in protein-protein interactions, located C-terminal to a stretch of basic amino acids that functions as a DNA binding domain. Two alternative transcripts encoding the same protein have been described. Two pseudogenes are located on the X chromosome at q28 in a region containing a large inverted duplication. |
| <i>AKT1</i>    | The serine-threonine protein kinase encoded by the AKT1 gene is catalytically inactive in serum-starved primary and immortalized fibroblasts. AKT1 and the related AKT2 are activated by platelet-derived growth factor. The activation is rapid and specific, and it is abrogated by mutations in the pleckstrin homology domain of AKT1. It was shown that the activation occurs through phosphatidylinositol 3-kinase. In the developing nervous system AKT is a critical mediator of growth factor-induced neuronal survival. Survival factors can suppress apoptosis in a transcription-independent manner by activating the serine/threonine kinase AKT1, which then phosphorylates and inactivates components of the apoptotic machinery. Mutations in this gene have been associated with the Proteus syndrome. Multiple alternatively spliced transcript variants have been found for this gene                         |
| <i>MDGA1</i>   | Not available                                                                                                                                                                                                                                                                                                                                                                                                                                                                                                                                                                                                                                                                                                                                                                                                                                                                                                                    |
| <i>PDE4B</i>   | This gene is a member of the type IV, cyclic AMP (cAMP)-specific, cyclic nucleotide phosphodiesterase (PDE) family. Cyclic nucleotides are important second messengers that regulate and mediate a number of cellular responses to extracellular signals, such as hormones, light, and neurotransmitters. The cyclic nucleotide phosphodiesterases (PDEs) regulate the cellular concentrations of cyclic nucleotides and thereby play a role in signal transduction. This gene encodes a protein that specifically hydrolyzes cAMP. Altered activity of this protein has been associated with schizophrenia and bipolar affective disorder.                                                                                                                                                                                                                                                                                      |
| <i>FEZ1</i>    | This gene is an ortholog of the <i>C. elegans</i> <i>unc-76</i> gene, which is necessary for normal axonal bundling and elongation within axon bundles. Expression of this gene in <i>C. elegans</i> <i>unc-76</i> mutants can restore to the mutants partial locomotion and axonal fasciculation, suggesting that it also functions in axonal outgrowth. The N-terminal half of the gene product is highly acidic.                                                                                                                                                                                                                                                                                                                                                                                                                                                                                                              |
| <i>TF3</i>     | The protein encoded by this gene is a member of the neurotrophin family, that controls survival and differentiation of mammalian neurons. This protein is closely related to both nerve growth factor and brain-derived neurotrophic factor. It may be involved in the maintenance of the adult nervous system, and may affect development of neurons in the embryo when it is expressed in human placenta. NTF3-deficient mice generated by gene targeting display severe movement defects of the limbs.                                                                                                                                                                                                                                                                                                                                                                                                                        |
| <i>ADRBK2</i>  | The beta-adrenergic receptor kinase specifically phosphorylates the agonist-occupied form of the beta-adrenergic and related G protein-coupled receptors. Overall, the beta adrenergic receptor kinase 2 has 85% amino acid similarity with beta adrenergic receptor kinase 1, with the protein kinase catalytic domain having 95% similarity. These data suggest the existence of a family of receptor kinases which may serve broadly to regulate receptor function.                                                                                                                                                                                                                                                                                                                                                                                                                                                           |
| <i>CACNA1C</i> | This gene encodes an alpha-1 subunit of a voltage-dependent calcium channel. Calcium channels mediate the influx of calcium ions into the cell upon membrane polarization. The alpha-1 subunit consists of 24 transmembrane segments and forms the pore through which ions pass into the cell. The calcium channel consists of a complex of alpha-1, alpha-2/delta, beta, and gamma subunits in a 1:1:1:1 ratio. There are multiple isoforms of each of these proteins, either encoded by different genes or the result of alternative splicing of transcripts. The protein encoded by this gene binds to and is inhibited by dihydropyridine.                                                                                                                                                                                                                                                                                   |

## *ADRA2A*

Alpha-2-adrenergic receptors are members of the G protein-coupled receptor superfamily. They include 3 highly homologous subtypes: alpha2A, alpha2B, and alpha2C. These receptors have a critical role in regulating neurotransmitter release from sympathetic nerves and from adrenergic neurons in the central nervous system. Studies in mouse revealed that both the alpha2A and alpha2C subtypes were required for normal presynaptic control of transmitter release from sympathetic nerves in the heart and from central noradrenergic neurons; the alpha2A subtype inhibited transmitter release at high stimulation frequencies, whereas the alpha2C subtype modulated neurotransmission at lower levels of nerve activity. This gene encodes alpha2A subtype and it contains no introns in either its coding or untranslated sequences

**Supplemental Table 4** – Transcripts from the 233 DEG that were affected by pH.

| <b>Transcripts</b>     | <b>ENTREZID</b> | <b>GENE NAME</b>                                                         |
|------------------------|-----------------|--------------------------------------------------------------------------|
| <i>A_24_P715434</i>    | NA              | NA                                                                       |
| <i>A_32_P204565</i>    | NA              | NA                                                                       |
| <i>A_32_P218131</i>    | NA              | NA                                                                       |
| <i>A_32_P58912</i>     | NA              | NA                                                                       |
| <i>AK024584</i>        | NA              | NA                                                                       |
| <i>AK098638</i>        | NA              | NA                                                                       |
| <i>AK123157</i>        | NA              | NA                                                                       |
| <i>ALDH1L1</i>         | 10840           | aldehyde dehydrogenase 1 family, member L1                               |
| <i>ARHGEF10</i>        | 9639            | Rho guanine nucleotide exchange factor (GEF) 10                          |
| <i>ATP13A4</i>         | 84239           | ATPase type 13A4                                                         |
| <i>ATP1B2</i>          | 482             | ATPase, Na <sup>+</sup> /K <sup>+</sup> transporting, beta 2 polypeptide |
| <i>BBS2</i>            | 583             | Bardet-Biedl syndrome 2                                                  |
| <i>BC042172</i>        | NA              | NA                                                                       |
| <i>BC062473</i>        | NA              | NA                                                                       |
| <i>C1R</i>             | 715             | complement component 1, r subcomponent                                   |
| <i>GLIS3-AS1</i>       | 84850           | GLIS3 antisense RNA 1                                                    |
| <i>CD52</i>            | 1043            | CD52 molecule                                                            |
| <i>CR626626</i>        | NA              | NA                                                                       |
| <i>DCAKD</i>           | 79877           | dephospho-CoA kinase domain containing                                   |
| <i>DPYSL2</i>          | 1808            | dihydropyrimidinase-like 2                                               |
| <i>DUSP1</i>           | 1843            | dual specificity phosphatase 1                                           |
| <i>DUSP2</i>           | 1844            | dual specificity phosphatase 2                                           |
| <i>DYNLL2</i>          | 140735          | dynein, light chain, LC8-type 2                                          |
| <i>ECHDC2</i>          | 55268           | enoyl CoA hydratase domain containing 2                                  |
| <i>EGFR</i>            | 1956            | epidermal growth factor receptor                                         |
| <i>EGR2</i>            | 1959            | early growth response 2                                                  |
| <i>SLC14A1</i>         | 6563            | solute carrier family 14 (urea transporter), member 1 (Kidd blood group) |
| <i>POU2F1</i>          | 5451            | POU class 2 homeobox 1                                                   |
| <i>ENST00000379884</i> | NA              | NA                                                                       |
| <i>FKBP5</i>           | 2289            | FK506 binding protein 5                                                  |
| <i>FLJ38359</i>        | NA              | NA                                                                       |
| <i>GAA</i>             | 2548            | glucosidase, alpha; acid                                                 |
| <i>GOT2</i>            | 2806            | glutamic-oxaloacetic transaminase 2, mitochondrial                       |
| <i>HIF3A</i>           | 64344           | hypoxia inducible factor 3, alpha subunit                                |
| <i>HSPBP1</i>          | 23640           | HSPA (heat shock 70kDa) binding protein, cytoplasmic cochaperone 1       |
| <i>IFT88</i>           | 8100            | intraflagellar transport 88 homolog (Chlamydomonas)                      |
| <i>TECPR2</i>          | 9895            | tectonin beta-propeller repeat containing 2                              |
| <i>LOC441244</i>       | NA              | NA                                                                       |
| <i>LOC92154</i>        | NA              | NA                                                                       |
| <i>LPAAT-THETA</i>     | NA              | NA                                                                       |
| <i>M69296</i>          | NA              | NA                                                                       |
| <i>CDKN2AIPNL</i>      | 91368           | CDKN2A interacting protein N-terminal like                               |
| <i>MGC42105</i>        | NA              | NA                                                                       |

|                   |        |                                                                            |
|-------------------|--------|----------------------------------------------------------------------------|
| <i>MRVI1</i>      | 10335  | murine retrovirus integration site 1 homolog                               |
| <i>MT1X</i>       | 4501   | metallothionein 1X                                                         |
| <i>SND1-IT1</i>   | 27099  | SND1 intronic transcript 1 (non-protein coding)                            |
| <i>NETO2</i>      | 81831  | neuropilin (NRP) and tolloid (TLL)-like 2                                  |
| <i>NHLRC2</i>     | 374354 | NHL repeat containing 2                                                    |
| <i>NIP7</i>       | 51388  | NIP7, nucleolar pre-rRNA processing protein                                |
| <i>PALLD</i>      | 23022  | palladin, cytoskeletal associated protein                                  |
| <i>PIGA</i>       | 5277   | phosphatidylinositol glycan anchor biosynthesis, class A                   |
| <i>FERMT2</i>     | 10979  | fermitin family member 2                                                   |
| <i>PLIN1</i>      | 5346   | perilipin 1                                                                |
| <i>POLR3H</i>     | 171568 | polymerase (RNA) III (DNA directed) polypeptide H (22.9kD)                 |
| <i>PPAPDC1B</i>   | 84513  | phosphatidic acid phosphatase type 2 domain containing 1B                  |
| <i>RAB34</i>      | 83871  | RAB34, member RAS oncogene family                                          |
| <i>RHCE</i>       | 6006   | Rh blood group, CcEe antigens                                              |
| <i>RMND5B</i>     | 64777  | required for meiotic nuclear division 5 homolog B ( <i>S. cerevisiae</i> ) |
| <i>SCGB1D1</i>    | 10648  | secretoglobin, family 1D, member 1                                         |
| <i>SDC4</i>       | 6385   | syndecan 4                                                                 |
| <i>SEC31A</i>     | 22872  | SEC31 homolog A ( <i>S. cerevisiae</i> )                                   |
| <i>SLC15A2</i>    | 6565   | solute carrier family 15 (oligopeptide transporter), member 2              |
| <i>SLC29A1</i>    | 2030   | solute carrier family 29 (equilibrative nucleoside transporter), member 1  |
| <i>SOD3</i>       | 6649   | superoxide dismutase 3, extracellular                                      |
| <i>THC2364621</i> | NA     | NA                                                                         |
| <i>THC2404308</i> | NA     | NA                                                                         |
| <i>THC2407386</i> | NA     | NA                                                                         |
| <i>THC2443552</i> | NA     | NA                                                                         |
| <i>THC2446669</i> | NA     | NA                                                                         |
| <i>THC2453189</i> | NA     | NA                                                                         |
| <i>TMEM38A</i>    | 79041  | transmembrane protein 38A                                                  |
| <i>TMPRSS5</i>    | 80975  | transmembrane protease, serine 5                                           |
| <i>TPCN1</i>      | 53373  | two pore segment channel 1                                                 |
| <i>TTC18</i>      | 118491 | tetratricopeptide repeat domain 18                                         |
| <i>TTC7A</i>      | 57217  | tetratricopeptide repeat domain 7A                                         |
| <i>ZMYM5</i>      | 9205   | zinc finger, MYM-type 5                                                    |
| <i>ZNF442</i>     | 79973  | zinc finger protein 442                                                    |
| <i>ZSCAN25</i>    | 221785 | zinc finger and SCAN domain containing 25                                  |

---

**Supplemental Table 5** – Analyses of the 228 DEG genes from the comparison that revealed genes associated to neuronal development related to schizophrenia and the 233 DEG from the comparison between brain bulks of patients with schizophrenia and health control. This analysis compared both set of DEGs to the modules extracted from neocortical development described in Parikshak et al (2013).

| <b>Brain Development Modules</b> | <b>Set of 228 DEG (pvalue)</b> | <b>Set of 233 DEG (pvalue)</b> |
|----------------------------------|--------------------------------|--------------------------------|
| M1                               | 0,306                          | <b>0,038</b>                   |
| M2                               | 0,822                          | 0,656                          |
| M3                               | 0,100                          | 0,908                          |
| M4                               | 0,650                          | 0,961                          |
| M5                               | 0,858                          | <b>0,048</b>                   |
| M6                               | 0,188                          | 1,000                          |
| M8                               | <b>0,015</b>                   | 0,567                          |
| M9                               | 0,142                          | 0,861                          |
| M10                              | 1,000                          | 1,000                          |
| M11                              | 0,518                          | 0,394                          |
| M12                              | 0,988                          | 0,964                          |
| M13                              | 0,534                          | 0,306                          |
| M14                              | 0,170                          | 1,000                          |
| M15                              | 0,224                          | <b>0,001</b>                   |
| M16                              | 0,233                          | 0,789                          |
| M17                              | 0,169                          | 0,996                          |
| M18                              | 0,489                          | 0,241                          |

*M8 and M15 were representative of genes preferentially expressed in “early” and “late” foetal period in human brain development, respectively.*
